# Supplementary material
Source: publisher site journal article supplement (https://www.dovepress.com/article/573742)
Supplement: Supplementary file 1 [file 573742%20Supplementary%20Tables%201-4.docx]

| **Exposure** | **Live birth** | **Clinical pregnancy** | **Multiple pregnancy** |
| --- | --- | --- | --- |
| **OR 95%CI p-value** | **OR 95%CI p-value** | **OR 95%CI p-value** |
| **Female age (years)** | 0.90 (0.89, 0.91) <0.001 | 0.91 (0.90, 0.92) <0.001 | 0.91 (0.90, 0.93) <0.001 |
| **Male age (years)** | 0.93 (0.92, 0.94) <0.001 | 0.94 (0.93, 0.95) <0.001 | 0.94 (0.92, 0.95) <0.001 |
| **BMI (kg/m2)** | 0.98 (0.96, 1.00) 0.015 | 1.00 (0.98, 1.02) 0.751 | 1.00 (0.98, 1.02) 0.949 |
| **Infertility duration (years)** | 0.95 (0.93, 0.98) <0.001 | 0.96 (0.94, 0.99) 0.003 | 0.97 (0.94, 1.00) 0.029 |
| **Infertility type** |  |  |  |
| **Primary infertility** | 1 | 1 | 1 |
| **Secondary infertility** | 0.65 (0.58, 0.74) <0.001 | 0.72 (0.64, 0.81) <0.001 | 0.70 (0.61, 0.81) <0.001 |
| **Basal FSH (IU/L)** | 0.95 (0.93, 0.97) <0.001 | 0.94 (0.92, 0.96) <0.001 | 0.93 (0.91, 0.96) <0.001 |
| **Basal LH (IU/L)** | 1.05 (1.04, 1.07) <0.001 | 1.06 (1.04, 1.08) <0.001 | 1.02 (1.01, 1.04) 0.007 |
| **AMH (ng/mL)** | 1.09 (1.07, 1.12) <0.001 | 1.11 (1.08, 1.14) <0.001 | 1.07 (1.04, 1.09) <0.001 |
| **AFC (n)** | 1.03 (1.02, 1.03) <0.001 | 1.03 (1.03, 1.04) <0.001 | 1.03 (1.02, 1.03) <0.001 |
| **Transfer cycle number (n)** | 0.93 (0.87, 0.98) 0.008 | 0.90 (0.85, 0.96) 0.001 | 0.86 (0.80, 0.92) <0.001 |
| **Fertilization type** |  |  |  |
| **IVF** | 1 | 1 | 1 |
| **RICSI** | 1.24 (0.92, 1.65) 0.153 | 1.10 (0.81, 1.49) 0.539 | 1.32 (0.97, 1.80) 0.082 |
| **ICSI** | 1.00 (0.87, 1.16) 0.972 | 0.96 (0.83, 1.12) 0.611 | 0.92 (0.78, 1.09) 0.343 |
| **PESA/TESA-ICSI** | 1.06 (0.78, 1.46) 0.699 | 1.00 (0.72, 1.38) 0.998 | 1.22 (0.87, 1.72) 0.251 |
| **FET Protocol** |  |  |  |
| **HRT** | 1 | 1 | 1 |
| **mNC** | 1.17 (0.90, 1.51) 0.236 | 1.11 (0.85, 1.45) 0.461 | 0.81 (0.60, 1.10) 0.178 |
| **Mild stimulation** | 0.80 (0.57, 1.13) 0.206 | 0.81 (0.57, 1.14) 0.230 | 0.70 (0.46, 1.08) 0.104 |
| **Gn stimulation** | 0.82 (0.61, 1.10) 0.184 | 1.16 (0.85, 1.57) 0.345 | 0.83 (0.59, 1.17) 0.294 |

**Table S1.** Univariate analysis for baseline variables and clinical outcomes of FET cycles.

**Table S2.** Univariate analysis for baseline variables and clinical outcomes of FET cycles with previous transfer failures (more than three times).

| **Exposure** | **Live birth** | **Clinical pregnancy** | **Multiple pregnancy** |
| --- | --- | --- | --- |
| **OR 95%CI p-value** | **OR 95%CI p-value** | **OR 95%CI p-value** |
| **Female age (years)** | 0.89 (0.85, 0.93) <0.001 | 0.88 (0.84, 0.92) <0.001 | 0.92 (0.88, 0.97) 0.004 |
| **Male age (years)** | 0.93 (0.89, 0.96) <0.001 | 0.92 (0.89, 0.95) <0.001 | 0.95 (0.91, 1.00) 0.040 |
| **BMI (kg/m2)** | 0.99 (0.93, 1.04) 0.593 | 0.99 (0.94, 1.04) 0.671 | 0.99 (0.93, 1.06) 0.805 |
| **Infertility duration (years)** | 0.99 (0.92, 1.06) 0.767 | 0.97 (0.91, 1.04) 0.427 | 0.98 (0.90, 1.07) 0.620 |
| **Infertility type** |  |  |  |
| **Primary infertility** | 1 | 1 | 1 |
| **Secondary infertility** | 0.91 (0.63, 1.31) 0.618 | 1.10 (0.76, 1.60) 0.601 | 0.89 (0.57, 1.39) 0.610 |
| **Basal FSH (IU/L)** | 0.97 (0.89, 1.06) 0.499 | 0.92 (0.85, 1.00) 0.058 | 0.94 (0.85, 1.05) 0.291 |
| **Basal LH (IU/L)** | 1.03 (0.97, 1.09) 0.308 | 1.03 (0.97, 1.09) 0.349 | 1.00 (0.93, 1.07) 0.894 |
| **AMH (ng/mL)** | 1.02 (0.94, 1.10) 0.642 | 1.12 (1.02, 1.22) 0.013 | 1.02 (0.93, 1.12) 0.717 |
| **AFC (n)** | 1.01 (0.99, 1.03) 0.476 | 1.03 (1.01, 1.06) 0.005 | 1.01 (0.98, 1.03) 0.506 |
| **Transfer cycle number (n)** | 1.01 (0.83, 1.24) 0.887 | 0.96 (0.78, 1.18) 0.700 | 0.71 (0.51, 0.97) 0.0320 |
| **Fertilization type** |  |  |  |
| **IVF** | 1 | 1 | 1 |
| **RICSI** | 4.21 (0.88, 20.09) 0.071 | 2.82 (0.59, 13.48) 0.194 | 2.51 (0.69, 9.14) 0.1620 |
| **ICSI** | 1.35 (0.86, 2.13) 0.192 | 1.12 (0.71, 1.79) 0.618 | 0.75 (0.42, 1.37) 0.352 |
| **PESA/TESA-ICSI** | 1.32 (0.35, 4.98) 0.687 | 0.88 (0.23, 3.34) 0.853 | 1.89 (0.46, 7.72) 0.378 |
| **FET Protocol** |  |  |  |
| **HRT** | 1 | 1 | 1 |
| **mNC** | 2.09 (0.88, 4.96) 0.094 | 1.51 (0.64, 3.58) 0.351 | 0.15 (0.02, 1.09) 0.061 |
| **Mild stimulation** | 0.54 (0.19, 1.48) 0.230 | 0.63 (0.24, 1.67) 0.354 | 0.47 (0.10, 2.08) 0.319 |
| **Gn stimulation** | 1.13 (0.60, 2.13) 0.700 | 1.64 (0.83, 3.24) 0.156 | 0.93 (0.43, 2.01) 0.850 |

**Table S3.** Multivariate analysis for Sequential embryos transfer in FET cycles compared to Double cleavage-stage embryos transfer involved in the clinical pregnancy rate, live birth rate and multiple pregnancy rate.

| **Exposure** | **Clinical pregnancy** | | | **Live birth** | | | **Multiple pregnancy** | | |
| --- | --- | --- | --- | --- | --- | --- | --- | --- | --- |
| **Adjusted RR** | **95% CI** | **p value** | **Adjusted RR** | **95% CI** | **p value** | **Adjusted OR** | **95% CI** | **p value** |
| Double cleavage-stage embryos transfer | 1 | 1 | 0.006 | 1 | 1 | 0.050 | 1 | 1 | 0.014 |
| Sequential embryos transfer | 1.132 | (1.024, 1.257) | 1.124 | (0.984, 1.279) | 0.617 | (0.420, 0.907) |

**Adjust for:** female age, male age, infertility type, infertility duration, Basal FSH, Basal LH, AMH, AFC.

**Table S4.** Multivariate analysis for Sequential embryos transfer in FET cycles with previous transfer failures compared to Double cleavage-stage embryos transfer involved in the clinical pregnancy rate, live birth rate and multiple pregnancy rate.

| **Exposure** | **Clinical pregnancy** | | | **Live birth** | | | **Multiple pregnancy** | | |
| --- | --- | --- | --- | --- | --- | --- | --- | --- | --- |
| **Adjusted RR** | **95% CI** | **p value** | **Adjusted RR** | **95% CI** | **p value** | **Adjusted OR** | **95% CI** | **p value** |
| Double cleavage-stage embryos transfer | 1 | 1 | 0.345 | 1 | 1 | 0.075 | 1 | 1 | 0.049 |
| Sequential embryos transfer | 1.061 | (0.741, 1.396) | 1.280 | (0.906, 1.744) | 0.335 | (0.113, 0.995) |

**Adjust for:** female age, male age
